# EZH2 Codon 641 Mutations are Common in BCL2-Rearranged Germinal Center B Cell Lymphomas

Russell J. H. Ryan<sup>1,2\*</sup>, Mai Nitta<sup>1</sup>, Darrell Borger<sup>1</sup>, Lawrence R. Zukerberg<sup>1</sup>, Judith A. Ferry<sup>1</sup>, Nancy Lee Harris<sup>1</sup>, A. John Iafrate<sup>1</sup>, Bradley E. Bernstein<sup>1,2,3</sup>, Aliyah R. Sohani<sup>1,9</sup>, Long Phi Le<sup>1,9</sup>

**1** Department of Pathology, Massachusetts General Hospital, Boston, Massachusetts, United States of America, **2** Broad Institute of Massachusetts Institute of Technology and Harvard University, Cambridge, Massachusetts, United States of America, **3** Howard Hughes Medical Institute, Chevy Chase, Maryland, United States of America

## Abstract

Mutations at codon 641 of *EZH2* are recurrent in germinal center B cell lymphomas, and the most common variants lead to altered *EZH2* enzymatic activity and enhanced tri-methylation of histone H3 at lysine 27, a repressive chromatin modification. As an initial step toward screening patients for cancer genotype-directed therapy, we developed a screening assay for *EZH2* codon 641 mutations amenable for testing formalin-fixed clinical specimens, based on the sensitive SNaPshot single nucleotide extension technology. We detected *EZH2* mutations in 12/55 (22%) follicular lymphomas (FL), 5/35 (14%) diffuse large B cell lymphomas with a germinal center immunophenotype (GCB-DLBCL), and 2/11 (18%) high grade B cell lymphomas with concurrent rearrangements of *BCL2* and *MYC*. No *EZH2* mutations were detected in cases of Burkitt lymphoma (0/23). *EZH2* mutations were frequently associated with the presence of *BCL2* rearrangement (BCL2-R) in both the FL (28% of BCL2-R cases versus 0% of BCL2-WT cases,  $p < 0.05$ ) and GCB-DLBCL groups (33% of BCL2-R cases versus 4% of BCL2-WT cases,  $p < 0.04$ ), and across all lymphoma types excluding BL (27% of BCL2-R cases versus 3% of BCL2-WT cases,  $p < 0.003$ ). We confirmed gain-of-function activity for all previously reported *EZH2* codon 641 mutation variants. Our findings suggest that *EZH2* mutations constitute an additional genetic "hit" in many *BCL2*-rearranged germinal center B cell lymphomas. Our work may be helpful in the selection of lymphoma patients for future trials of pharmacologic agents targeting *EZH2* and *EZH2*-regulated pathways.

**Citation:** Ryan RJH, Nitta M, Borger D, Zukerberg LR, Ferry JA, et al. (2011) EZH2 Codon 641 Mutations are Common in BCL2-Rearranged Germinal Center B Cell Lymphomas. PLoS ONE 6(12): e28585. doi:10.1371/journal.pone.0028585

**Editor:** Luwen Zhang, University of Nebraska – Lincoln, United States of America

**Received:** August 31, 2011; **Accepted:** November 10, 2011; **Published:** December 14, 2011

**Copyright:** © 2011 Ryan et al. This is an open-access article distributed under the terms of the Creative Commons Attribution License, which permits unrestricted use, distribution, and reproduction in any medium, provided the original author and source are credited.

**Funding:** Funding was provided by the Austin L. Vickery, Jr. Award Program, Department of Pathology, Massachusetts General Hospital, and the Howard Hughes Medical Institute. The funders had no role in study design, data collection and analysis, decision to publish, or preparation of the manuscript.

**Competing Interests:** Dr. Iafrate submitted a patent application for SNaPshot tumor genotyping methods similar to those used in this study (United States provisional patent 12/799,415). This does not alter the authors' adherence to all the PLoS ONE policies on sharing data and materials.

\* E-mail: Ryan.Russell@mgh.harvard.edu

**9** These authors contributed equally to this work.

## Introduction

Human mature B cell lymphomas encompass a diverse spectrum of biologically and clinically distinct entities, many of which appear to recapitulate a specific stage of B cell development by morphologic, immunophenotypic and/or gene expression criteria. Follicular lymphoma (FL), Burkitt lymphoma (BL), and a gene expression-defined subset of diffuse large B cell lymphoma (germinal center B cell-phenotype diffuse large B cell lymphoma, or GCB-DLBCL) all recapitulate biological features of normal germinal center B cells. [1,2] As new discoveries have improved our understanding of the genetics and phenotypic characteristics of B cell lymphomas, it has become clear that some oncogenic mutations occur with increased frequency, or even exclusively, in lymphomas of a certain phenotype. One prominent example is the t(14;18)(q32;q21) *IGH-BCL2* rearrangement, which leads to overexpression of the Bcl-2 oncoprotein, and is frequently present in follicular lymphoma and GCB-DLBCL, but not in other gene expression-defined subtypes of DLBCL. [3]

*EZH2* encodes the enzymatic subunit of the polycomb repressive complex 2 (PRC2), which mediates gene repression through trimethylation of histone H3 at lysine 27 (H3K27). Point mutations

affecting codon 641 of *EZH2* were recently described in a subset of GCB-DLBCL and FL, [4] but were absent from activated B cell-phenotype DLBCL (ABC-DLBCL), small lymphocytic lymphoma, mantle cell lymphoma, and peripheral T cell lymphoma, all of which lack a germinal center phenotype. Lymphoma-associated mutations affecting *EZH2* were initially reported to result in enzymatic loss-of-function based on *in vitro* studies which used unmodified histone tails as a substrate for modification by recombinant PRC2 complexes, but the most common variants have subsequently been shown to possess increased activity in trimethylation of H3K27 in the mono- or di-methylated state. [5,6] Overexpression and hyperactivity of *EZH2* have been implicated in the pathogenesis of several cancer types, including prostate, [7,8] breast, and endometrial carcinomas, as well as melanoma. [9] The discovery that *EZH2* is a mutant oncogene in germinal center-phenotype B cell lymphomas raises the possibility of targeting this pathway pharmacologically in the treatment of patients with these lymphomas. Important steps toward this goal include further delineation of the lymphoma types in which this mutation occurs, and development of assays amenable to detection of these mutations in routine clinical specimens.



the coding sequence of *EZH2* RefSeq isoform C was subcloned into pCDNA3.2/V5-DEST using the Gateway recombination system (Invitrogen). Codon 641 and 689 point mutations were generated in pENTRY vectors using the QuickChange Lightning kit (Stratagene) and were subcloned into pCDNA3.2/V5-DEST. SET domain-truncated *EZH2* (*EZH2ΔSET*) was generated by PCR subcloning with the C-terminal primer 5'-GGGGAC-CACTTTGTACAAGAAAGCTGGGTTTCATGCCAGCAATA-GATGCTTTTT-3' as previously described. [7]

### EZH2 transgene expression and western blotting

*EZH2* vectors were transfected into sub-confluent NIH-3T3 murine fibroblasts with Fugene HD reagent (Roche) according to the manufacturer's instructions. Cells were harvested 72 hours later and conventional western blotting was performed on whole-cell extracts (targets: EZH2, Beta-actin), or acid-extracted histones (targets: total H3, H3K27me3, H3K27me2, H3K27me1, H3K9me3). Ponceau S was used to confirm transfer of equivalent total protein levels in all lanes prior to antibody binding. The antibodies used for western blot are as follows:

- Beta-actin – Abcam (Cambridge, MA), Cat# ab8827 (rabbit)
- EZH2 – Active Motif (Carlsbad, CA), Cat# 39639 (rabbit)
- H3 (total) – Abcam, Cat# ab1791 (rabbit)
- H3K9me3 – Abcam, Cat# ab8898 (rabbit)
- H3K27me1 – Active Motif, Cat# 39377 (rabbit)
- H3K27me2 – Abcam, Cat# ab24684 (rabbit)
- H3K27me3 – Millipore (Billerica, MA), Cat# 07-449 (rabbit)

### RNA-seq analysis

Published RNA-seq data for DLBCL cell lines Oci-Ly1, Oci-Ly7, and Oci-Ly19 (SRA accession SRP001599) [14] were aligned to the human genome (Hg19) using TopHat [15] and analyzed with the Integrative Genomics Viewer. [16]

## Results

The results of SNaPshot genotyping in 124 germinal center B cell lymphomas are shown in Table 1. Overall, we detected *EZH2* codon 641 mutations in 19/124 (15%) cases. All mutations were genotyped redundantly by the corresponding forward and reverse extension primers, and were detected in independent screening and confirmatory runs. Detected mutations included all of the four most common reported variants (Figure 1). No novel mutations were identified.

The frequency of *EZH2* mutations within the various lymphoma subtypes is given in Table 1. Among the cases screened, *EZH2* mutations were detected with relatively high frequency in FL (12/55, 22%). There was no difference in *EZH2* mutation frequency between the low-PI and high-PI subgroups of grade 1–2 FL (low PI 7/23, 30%; high PI 4/18, 22%,  $p = 0.73$ ) or between *EZH2* mutation status and morphologic FL grade (Grade 1–2 11/41, 27%; Grade 3 1/14, 7%,  $p = 0.16$ ). Within the grade 3 FL group, 3 cases were graded as 3B, and none of these cases showed an *EZH2* mutation. We also detected *EZH2* mutations in the GCB-DLBCL (5/35, 14%) and DHL (2/11, 18%) groups, but not in any case of BL (0/23). Four of the five DLBCL *EZH2* mutations belonged to a group of nine DLBCL cases that had concurrent diagnoses of grade 3 FL.

We used FISH to screen for *BCL2* rearrangements in all of our lymphoma cases that were not previously tested for this aberration. As expected, *BCL2* rearrangements were detected in the majority of FL (78%) and in a smaller proportion of GCB-DLBCL (34%) (Table 1). We found these mutations to occur more frequently in *BCL2*-rearranged lymphomas than in lymphomas lacking a *BCL2*

rearrangement. The increased frequency of *EZH2* mutations was statistically significant in the FL group (28% of *BCL2*-R cases versus 0% of *BCL2*-WT cases,  $p < 0.05$ ), the DLBCL group (33% of *BCL2*-R cases versus 4% of *BCL2*-WT cases,  $p < 0.04$ ), and across all lymphoma types excluding BL, which universally lacked both *BCL2* rearrangements and *EZH2* mutations (27% of *BCL2*-R cases versus 3% of *BCL2*-WT cases,  $p < 0.003$ ) (Figure 2).

To determine the function of lymphoma-associated *EZH2* mutations in a cellular context, we PCR cloned the *EZH2* coding sequence from human bone marrow cDNA. Of the 7 independent clones we sequenced, all contained the exon 8–9 splice junction seen in *EZH2* Refseq isoform C (NM\_001203247), corresponding to the Y641 codon designation used in the initial description of the lymphoma mutation, [4] while no clones contained the exon 8–9 splice junction seen in the slightly longer *EZH2* Refseq isoform A (NM\_004456), which has been used as a reference transcript in some later work, resulting in designation of the same residue as Y646. [17,14] Alignment of published RNA-seq data for GCB-DLBCL cell lines Oci-Ly1, Oci-Ly7, and Oci-Ly19 demonstrated that the vast majority of reads spanning the *EZH2* exon 8–9 splice junction support the splice junction found in isoform C, and not the junction found in isoform A (Figure S1 and data not shown). Of the available spliced expressed sequence tags (ESTs) in GenBank (release 185.0, accessed August 30, 2011) derived from various tissues, 39/41 sequences match the exon 8–9 splice junction found in isoform C.

We generated expression vectors encoding wild-type *EZH2*, each of the five reported lymphoma-associated codon 641 mutants, and two well-characterized synthetic methyltransferase loss-of-function mutants, the point mutant H689A, [18] and a truncation mutant lacking the C-terminal methyltransferase (SET) domain. Western blotting of acid-extracted histones from transiently transfected NIH-3T3 fibroblasts showed no difference in global H3K27me3 levels between cells transfected with empty vector, wild-type *EZH2*, *EZH2ΔSET* (Figure 3), or *EZH2 H689A* (data not shown). In contrast, there was a marked increase in global H3K27me3 levels in cells transfected with each of the five lymphoma-associated mutants. There was no measurable difference in global levels of H3K27me2, H3K27me1, and H3K9me3 between the transfectants (Figure S2).

## Discussion

Our findings confirm and extend prior work regarding the prevalence of *EZH2* mutations in B cell lymphomas and the molecular function of these mutations. Clinical detection of oncogenic point mutations conferring enzymatic gain-of-function has been a fruitful strategy for triaging patients to molecularly targeted therapy in several cancer types, including lung adenocarcinoma (*EGFR* mutations) [19] and melanoma (*BRAF* V600E mutations). [20] While specific small-molecule inhibitors of *EZH2* are not yet clinically available, there is ongoing interest in the development of such agents. [5] Our SNaPshot-based assay reproducibly detected *EZH2* mutations in a substantial proportion of germinal center lymphomas from routine FFPE clinical specimens. The absence of *EZH2* mutations in BL highlights both the biological specificity of the *EZH2* codon 641 mutation for certain lymphoma subtypes, and the technical specificity of our assay.

In comparison to prior studies, we detected a relatively high rate of *EZH2* mutations in FL (22% overall and 27% in the common grade 1–2 subtype) compared to prior reports (7% [4] and 12% [21] overall). This may be due, in part, to the higher sensitivity of SNaPshot compared to Sanger (chain terminator) sequencing for

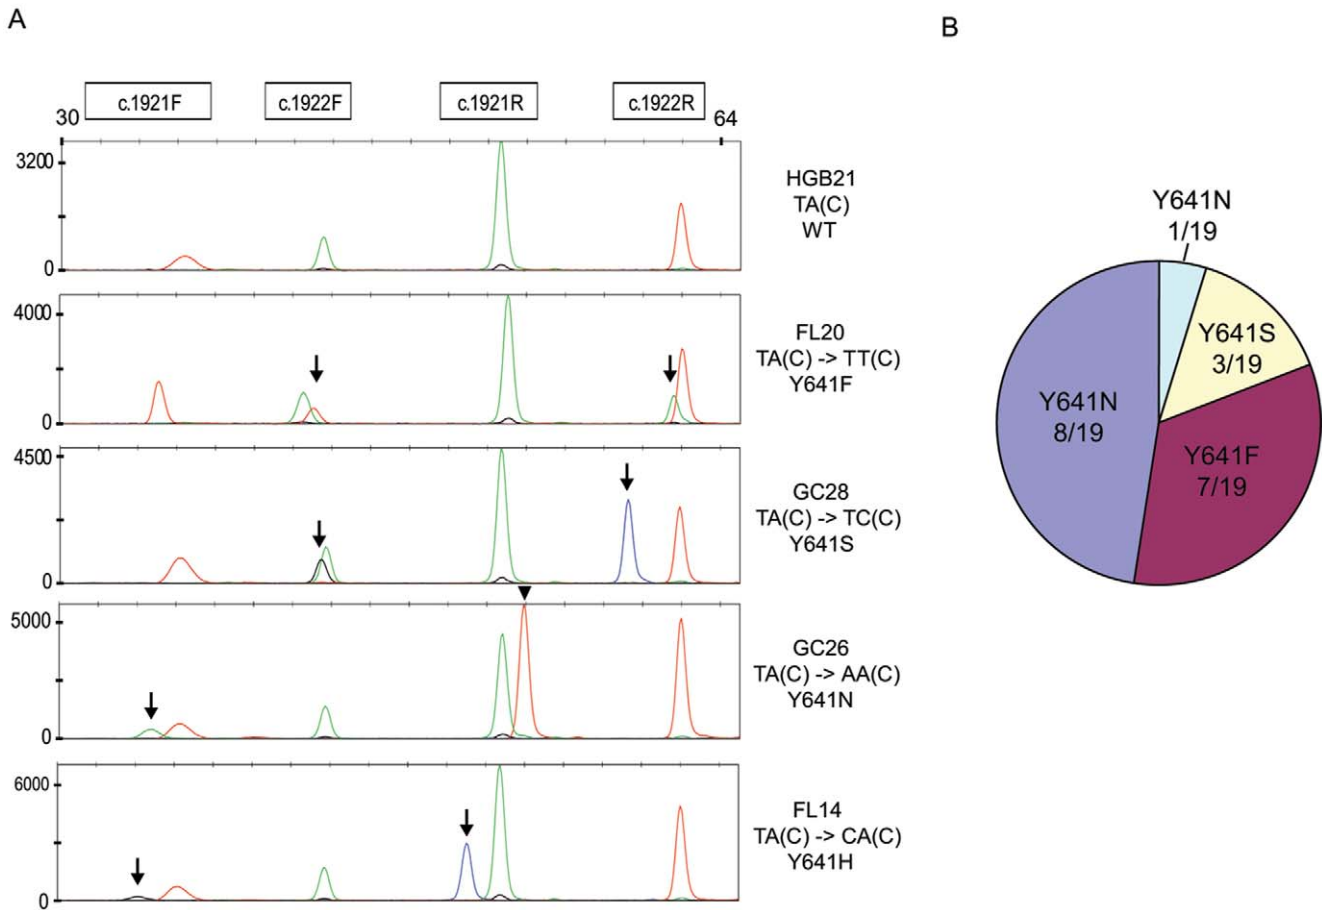

**Figure 1. SNaPshot detection of *EZH2* codon 641 mutations.** A: Representative electropherograms for SNaPshot genotyping of *EZH2* in B cell lymphomas. Five representative tracings are shown, representing lymphomas with wild-type *EZH2* codon 641 and each of the four distinct missense substitutions detected in this study. Two complementary mutant peaks (arrows) appear in each mutant sample, corresponding to detection of the missense substitution by both the forward and reverse primers at the same nucleotide position. B: Distribution of *EZH2* codon 641 missense mutations detected by SNaPshot.  
doi:10.1371/journal.pone.0028585.g001

**Table 1. *EZH2* and *BCL2* aberrations in germinal center lymphomas by category.**

| Classification                                   | <i>EZH2</i> mutated | <i>BCL2</i> rearranged |
|--------------------------------------------------|---------------------|------------------------|
| <b>All follicular lymphoma (n = 55)</b>          | <b>12 (22%)</b>     | <b>43 (78%)</b>        |
| Grade 1–2, low PI (n = 23)                       | 7 (30%)             | 21 (91%)               |
| Grade 1–2, high PI (n = 18)                      | 4 (22%)             | 15 (83%)               |
| Grade 3 (n = 14)*                                | 1 (7%)              | 7 (50%)                |
| <b>All GCB-DLBCL (n = 35)</b>                    | <b>5 (14%)</b>      | <b>12 (34%)</b>        |
| Pure DLBCL, no prior lymphoma (n = 23)**         | 1 (4%)              | 6 (26%)                |
| Concurrent DLBCL and grade 3 FL (n = 9)          | 4 (44%)             | 4 (44%)                |
| Prior low-grade FL (n = 1)                       | 0 (0%)              | 1 (100%)               |
| Prior low-grade lymphoma, not FL (n = 2)         | 0 (0%)              | 1 (50%)                |
| <b>“Double hit” B cell lymphomas (n = 11)***</b> | <b>2 (18%)</b>      | <b>11 (100%)</b>       |
| De novo (n = 7)                                  | 1 (14%)             | 7 (100%)               |
| History of follicular lymphoma (n = 4)           | 1 (25%)             | 4 (100%)               |
| <b>Burkitt lymphoma (n = 23)</b>                 | <b>0 (0%)</b>       | <b>0 (0%)</b>          |

\*Includes grades 3A (n=11) and 3B (n=3). All grade 3B cases lacked both *EZH2* mutation and *BCL2* rearrangement.

\*\*A single case within this group lacking both an *EZH2* mutation and a *BCL2* rearrangement had concurrent follicular lymphoma *in situ*.

\*\*\*All “double hit” B cell lymphomas had rearrangements of the *MYC* and *BCL2* loci.

doi:10.1371/journal.pone.0028585.t001

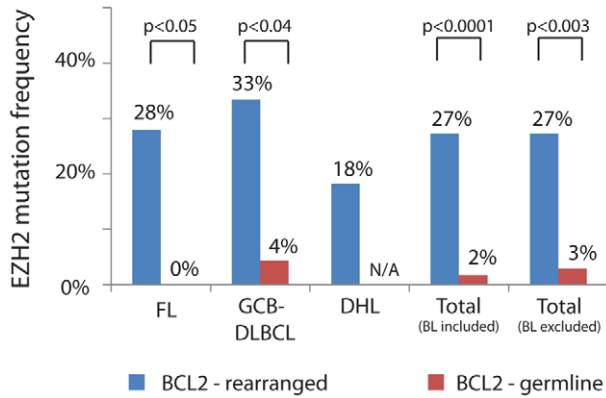

**Figure 2. Frequency of *EZH2* mutations in germinal center lymphomas by *BCL2* status.** Within each class of germinal center lymphoma, *EZH2* mutations were significantly more frequent in cases with rearrangements of *BCL2*. Burkitt lymphoma (not shown) universally lacked both aberrations. The two total columns at right include all lymphomas in the study (fourth column) or all lymphomas except BL (fifth column) – see table 1 for subtype distribution. Abbreviations: FL=follicular lymphoma, GCB-DLBCL=germinal center B-cell phenotype diffuse large B-cell lymphoma, DHL=“double hit” high-grade B-cell lymphoma (*MYC* and *BCL2* rearranged), BL=Burkitt lymphoma. doi:10.1371/journal.pone.0028585.g002

detection of mutations in heterogeneous tumor tissue. [13] Our results are consistent with those of a recent study which used deep-sequencing techniques (genome, exome, and RNA sequencing) on a small number of follicular lymphomas and reported *EZH2* mutations in 4/13 cases (31%). [14] Thus, the true rate of *EZH2* mutations in follicular lymphoma may be higher than originally reported. *EZH2* mutations were not enriched in more proliferative subgroups of FL (low grade/high PI FL and grade 3 FL), suggesting that *EZH2* mutations are not associated with known aggressive subtypes of FL. Larger studies with clinical follow-up will be required to determine whether this mutation carries independent prognostic significance in FL.

In contrast to the findings in FL, we detected mutations in a relatively low proportion of GCB-DLBCL (14%) compared to the original report (22%) [4]. Our use of an immunophenotypic surrogate for the GCB-DLBCL gene expression profile could partly explain this discrepancy, although our findings are similar to those of another recent study, which found *EZH2* mutations in 14% of a cohort of 63 microarray-defined GCB-DLBCL. [22] Interestingly four of the five *EZH2* mutations detected in the GCB-DLBCL cohort occurred in a subgroup of nine cases in which the diagnostic biopsy showed a large cell lymphoma with areas of both follicular and diffuse growth, resulting in concurrent diagnoses of DLBCL and grade 3 FL by current WHO criteria. [1] None of these nine patients had a prior history of follicular lymphoma, and these cases appear to represent *de novo* high-grade germinal center phenotype lymphomas with partial residual folliculotropism. This finding raises the possibility that *EZH2*-mutated DLBCL may have characteristic morphological and biological features, and merits further investigation.

The *EZH2* codon 641 mutation was first identified through whole-genome sequencing of a follicular lymphoma that lacked a t(14;18) *IGH-BCL2* rearrangement. [4] However, we found frequent, though not universal, co-occurrence of *EZH2* codon 641 mutations with rearrangements of *BCL2*. This implies that *EZH2* mutations do not substitute for *BCL2* rearrangement, but rather represent a functionally distinct oncogenic “hit” in germinal center B cell lymphomagenesis. Targeted inhibitors of *BCL2* have been developed, with some advancing into clinical trials. [23] Our finding that many lymphomas show oncogenic activation of both *BCL2* and *EZH2* raises the possibility that combined *BCL2* and *EZH2* inhibition may represent a potential therapeutic strategy for many patients.

BL is a prototypical germinal center-derived lymphoma, but shows substantial biologic, pathogenic, and epidemiologic differences from FL and DLBCL. [1] Our findings suggest that *EZH2* mutations are rare or absent in this lymphoma type. We did detect *EZH2* mutations in *MYC* and *BCL2*-rearranged “double hit” high grade B cell lymphomas, which often show morphologic, genetic, and immunophenotypic features intermediate between DLBCL

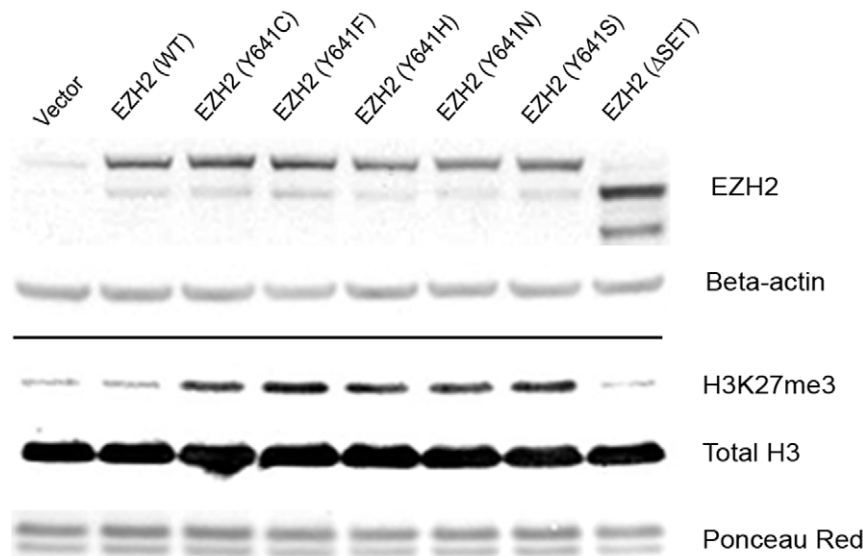

**Figure 3. Western blot of mutant *EZH2* expression in NIH-3T3 fibroblasts.** Transgenic expression of vectors encoding lymphoma-associated *EZH2* codon 641 mutants, but not wild-type or SET domain-truncated ( $\Delta$ SET) *EZH2*, leads to a consistent increase in global trimethylation of H3K27 compared to vector control. Western blot antibodies are listed on the right. Ponceau S depicts total protein at ~15 kDa on acid-extract blots. doi:10.1371/journal.pone.0028585.g003

and BL, and are associated with a poor prognosis [12]. Large-scale integrative studies including gene expression profiling have suggested that the relative paucity of large-scale genomic imbalances (“genetic complexity”) can be helpful in distinguishing “true” BL from other high-grade B cell lymphomas. [24] Our results suggest that *EZH2* mutation status could also potentially contribute to this distinction.

The results of our mutant EZH2 expression experiments indicate that the mutant protein conferred a gain-of-function phenotype as evidenced by increased generation of the H3K27me3 histone mark, the mechanism of which has been demonstrated by others. [5] Interestingly, the mutation that was most common in our series, Y641N, was estimated to be the most potent of the four common mutations at generating H3K27me3 in the heterozygous state, based on *in-vivo* enzyme kinetics, [5] while Y641H, the least common mutation in our series, was predicted to be least potent. These results suggest that more potent mutations may undergo stronger oncogenic selection. Our novel demonstration of a similar gain-of-function activity for the Y641C mutant in an overexpression assay is consistent with the reported occurrence of this mutation in B cell lymphoma, [4] in which most *EZH2* mutations are thought to confer gain-of-function. However, the Y641C mutation has also been reported in an acute myeloid leukemia cell line, despite the fact that many reported *EZH2* mutations in myeloid tumors are clearly inactivating. [17] These findings suggest the possibility of a more complex function for some myeloid *EZH2* mutations, and highlight the need for further functional investigation of these mutant proteins. While the H3K27me3 modification is known to have a repressive effect on gene expression, the precise genomic targets that are affected by the mutant protein during lymphomagenesis and confer selective advantage have not been identified.

For our transgenic work, we used a cDNA clone for *EZH2* with a coding sequence matching that of the original reported *EZH2* coding sequence [25] and *EZH2* Refseq isoform C (NM\_001203247). Our results suggest that this is the predominant long splice form of *EZH2* in lymphoma and other tissues, and for this reason we prefer to designate the *EZH2* codon affected by recurrent mutations in B cell lymphoma as Y641, rather than Y646. Shorter *EZH2* transcripts produced by variant splicing of exons 3 and 4 are also well supported by ESTs and other public data, and are of uncertain significance.

## References

1. Swerdlow SH, Campo E, Harris NL, Jaffe ES, Pileri SA, et al. (2008) WHO Classification of Tumors of Haematopoietic and Lymphoid Tissues. 4th ed. Lyon: International Agency for Research on Cancer. 440 p.
2. Alizadeh AA, Eisen MB, Davis RE, Ma C, Lossos IS, et al. (2000) Distinct types of diffuse large B-cell lymphoma identified by gene expression profiling. *Nature* 403: 503–511. Available: <http://www.ncbi.nlm.nih.gov/pubmed/10676951>. Accessed 26 Aug 2011.
3. Rosenwald A, Wright G, Chan WC, Connors JM, Campo E, et al. (2002) The use of molecular profiling to predict survival after chemotherapy for diffuse large-B-cell lymphoma. *New England Journal of Medicine* 346: 1937–47. Available: <http://www.ncbi.nlm.nih.gov/pubmed/12075054>.
4. Morin R, Johnson N, Severson T (2010) Somatic mutations altering EZH2 (Tyr641) in follicular and diffuse large B-cell lymphomas of germinal-center origin. *Nature Genetics* 42: 181–5. Available: <http://www.ncbi.nlm.nih.gov/pubmed/20081860>. Accessed 26 Aug 2011.
5. Sneeringer CJ, Scott MP, Kuntz KW, Knutson SK, Pollock RM, et al. (2010) Coordinated activities of wild-type plus mutant EZH2 drive tumor-associated hypertrimethylation of lysine 27 on histone H3 (H3K27) in human B-cell lymphomas. *Proceedings of the National Academy of Sciences* 107: 20980. Available: <http://www.ncbi.nlm.nih.gov/pubmed/21078963>. Accessed 26 Aug 2011.
6. Yap D, Chu J, Berg T, Schapira M, Cheng SWG, et al. (2011) Somatic mutations at EZH2 Y641 act dominantly through a mechanism of selectively altered PRC2 catalytic activity, to increase H3K27 trimethylation. *Blood* 117: 2451. Available: <http://bloodjournal.hematologylibrary.org/content/117/8/2451.short>. Accessed 14 Jul 2011.
7. Varambally S, Dhanasekaran SM, Zhou M, Barrette TR, Kumar-Sinha C, et al. (2002) The polycomb group protein EZH2 is involved in progression of prostate cancer. *Nature* 419: 624–629. Available: <http://www.nature.com/nature/journal/v419/n6907/abs/nature01075.html>. Accessed 22 Jan 2011.
8. Varambally S, Cao Q, Mani R-S, Shankar S, Wang X, et al. (2008) Genomic loss of microRNA-101 leads to overexpression of histone methyltransferase EZH2 in cancer. *Science* 322: 1695–9. Available: <http://www.pubmedcentral.nih.gov/articlerender.fcgi?artid=2684823&tool=pmcentrez&rendertype=abstract>. Accessed 30 Jul 2010.
9. Bachmann I, Halvorsen O, Collett K (2006) EZH2 Expression Is Associated With High Proliferation Rate and Aggressive Tumor Subgroups in Cutaneous Melanoma and Cancers of the Endometrium, Prostate, and Breast. *Journal of Clinical Oncology* 24: 268–73. Available: <http://www.ncbi.nlm.nih.gov/pubmed/16330673>. Accessed 26 Aug 2011.
10. Wang SA, Wang L, Hochberg EP, Muzikansky A, Harris NL, et al. (2005) Low histologic grade follicular lymphoma with high proliferation index: morphologic and clinical features. *American Journal of Surgical Pathology* 29: 1490–6. Available: <http://www.ncbi.nlm.nih.gov/pubmed/16224216>.
11. Hans CP, Weisenburger DD, Greiner TC, Gascoyne RD, Delabie J, et al. (2004) Confirmation of the molecular classification of diffuse large B-cell lymphoma by immunohistochemistry using a tissue microarray. *Blood* 103: 275–82. Available: <http://www.ncbi.nlm.nih.gov/pubmed/14504078>. Accessed 7 Jan 2011.

In conclusion, we have developed a clinically applicable assay for sensitive detection of *EZH2* codon 641 mutations in FFPE tissue, and demonstrate frequent occurrence of these gain-of-function mutations in the full biological spectrum of *BCL2*-rearranged germinal center phenotype B cell lymphomas, but not in Burkitt lymphoma.

## Supporting Information

**Figure S1** RNA-seq analysis of *EZH2* transcript splice variants in the DLBCL cell line Oci-Ly1. Alignment of RNA-seq data from the DLBCL cell line Oci-Ly-1 [14] to the 3' splice junction of *EZH2* exon 8 shows that the vast majority of transcripts contain the splice junction seen in *EZH2* isoform C (NM-001203247), as marked by the black arrow. Only rare reads, marked with a red arrow, support the alternate splice site seen in *EZH2* isoform A (NM\_004456), which encodes an additional 5 amino acids. Findings in the DLBCL cell lines Oci-Ly7 and Oci-Ly19 (not shown) were similar.

(TIF)

**Figure S2** Western blot of EZH2 mutant overexpression in NIH-3T3 fibroblasts. Transgenic overexpression of lymphoma-associated *EZH2* codon 641 mutants was not associated with differences in the global levels of histone marks H3K27me1, H3K27me2, and H3K9me3 compared to vector control, wild-type, or SET domain-inactivated *EZH2*.

(TIF)

## Acknowledgments

The authors would like to thank Kathy Vernovsky, Dora Dias-Santagata, and Julie Miller for assistance with the *EZH2* SNaPshot assay, Eric Mendenhall for assistance with *EZH2* cloning and transgenic experiments, Oren Ram for assistance with RNA-seq analysis, and Robert Hasserjian for helpful discussions.

## Author Contributions

Conceived and designed the experiments: RJHR AJI BEB LPL. Performed the experiments: RJHR MN DB LPL. Analyzed the data: RJHR MN ARS LPL. Contributed reagents/materials/analysis tools: DB LRZ JAF NLH AJI BEB ARS. Wrote the paper: RJHR. Revised the manuscript: JAF ARS LPL. Reviewed, classified, and selected cases for inclusion in the study: LRZ JAF NLH ARS.

12. Snuderl M, Kolman OK, Chen Y-B, Hsu JJ, Ackerman AM, et al. (2010) B-cell lymphomas with concurrent IGH-BCL2 and MYC rearrangements are aggressive neoplasms with clinical and pathologic features distinct from Burkitt lymphoma and diffuse large B-cell lymphoma. *American Journal of Surgical Pathology* 34: 327–40. Available: <http://www.ncbi.nlm.nih.gov/pubmed/20118770>.
13. Dias-Santagata D, Akhavanfard S, David SS, Vernovsky K, Kuhlmann G, et al. (2010) Rapid targeted mutational analysis of human tumours: a clinical platform to guide personalized cancer medicine. *EMBO Molecular Medicine* 2: 146–58. Available: <http://www.ncbi.nlm.nih.gov/pubmed/20432502>. Accessed 14 Jul 2011.
14. Morin RD, Mendez-Lago M, Mungall AJ, Goya R, Mungall KL, et al. (2011) Frequent mutation of histone-modifying genes in non-Hodgkin lymphoma. *Nature* 476: 298–303. Available: <http://www.nature.com/doi/10.1038/nature10351>. Accessed 24 Aug 2011.
15. Trapnell C, Pachter L, Salzberg SL (2009) TopHat: discovering splice junctions with RNA-Seq. *Bioinformatics* 25: 1105–11. Available: <http://www.pubmedcentral.nih.gov/articlerender.fcgi?artid=2672628&tool=pmcentrez&rendertype=abstract>. Accessed 18 Jul 2011.
16. Interests CF (2011) Integrative genomics viewer. *Genomics* 29: 24–26. doi:10.1038/nbt0111–24.
17. Ernst T, Chase AJ, Score J, Hidalgo-Curtis CE, Bryant C, et al. (2010) Inactivating mutations of the histone methyltransferase gene EZH2 in myeloid disorders. *Nature Genetics*. pp 1–20. Available: <http://www.ncbi.nlm.nih.gov/pubmed/20601953>. Accessed 6 Jul 2010.
18. Kuzmichev A, Nishioka K, Erdjument-Bromage H, Tempst P, Reinberg D (2002) Histone methyltransferase activity associated with a human multiprotein complex containing the Enhancer of Zeste protein. *Genes & Development* 16: 2893–905. Available: <http://www.pubmedcentral.nih.gov/articlerender.fcgi?artid=187479&tool=pmcentrez&rendertype=abstract>.
19. Lynch TJ, Bell DW, Sordella R, Gurubhagavata S, Okimoto RA, et al. (2004) Activating mutations in the epidermal growth factor receptor underlying responsiveness of non-small-cell lung cancer to gefitinib. *New England Journal of Medicine* 350: 2129–2139. Available: <http://www.nejm.org/doi/full/10.1056/NEJMoa040938>. Accessed 22 Jul 2011.
20. Flaherty KT, Puzanov I, Kim KB, Ribas A, McArthur Ga, et al. (2010) Inhibition of mutated, activated BRAF in metastatic melanoma. *New England Journal of Medicine* 363: 809–19. Available: <http://www.ncbi.nlm.nih.gov/pubmed/20818844>.
21. Bódör C, O’Riain C, Wrench D, Matthews J, Iyengar S, et al. (2011) EZH2 Y641 mutations in follicular lymphoma. *Leukemia* 25: 726–729. Available: <http://www.ncbi.nlm.nih.gov/pubmed/21233829>. Accessed 26 Aug 2011.
22. Pasqualucci L, Trifonov V, Fabbri G, Ma J (2011) Analysis of the coding genome of diffuse large B-cell lymphoma. *Nature Genetics* 43: 830–837. Available: <http://www.ncbi.nlm.nih.gov/pubmed/21804550>. Accessed 30 Aug 2011.
23. Kang MH, Reynolds CP (2009) Bcl-2 inhibitors: targeting mitochondrial apoptotic pathways in cancer therapy. *Clinical Cancer Research* 15: 1126–32. Available: <http://www.ncbi.nlm.nih.gov/pubmed/19228717>.
24. Hummel M, Bentink S, Berger H, Klapper W, Wessendorf S, et al. (2006) A biologic definition of Burkitt’s lymphoma from transcriptional and genomic profiling. *New England Journal of Medicine* 354: 2419–2430. Available: <http://www.nejm.org/doi/pdf/10.1056/NEJMoa055351>. Accessed 2 Apr 2011.
25. Laible G, Wolf A, Dorn R, Reuter G, Nislow C, et al. (1997) Mammalian homologues of the Polycomb-group gene Enhancer of zeste mediate gene silencing in *Drosophila* heterochromatin and at *S. cerevisiae* telomeres. *The EMBO Journal* 16: 3219–32. Available: <http://www.pubmedcentral.nih.gov/articlerender.fcgi?artid=1169939&tool=pmcentrez&rendertype=abstract>.
